# Supplementary figures and images for: In the search for ditriel B⋯Al non-covalent bonding
Source: Royal Society of Chemistry journal article supplement (doi:10.1039/d1nj01963e), 2021-01-01

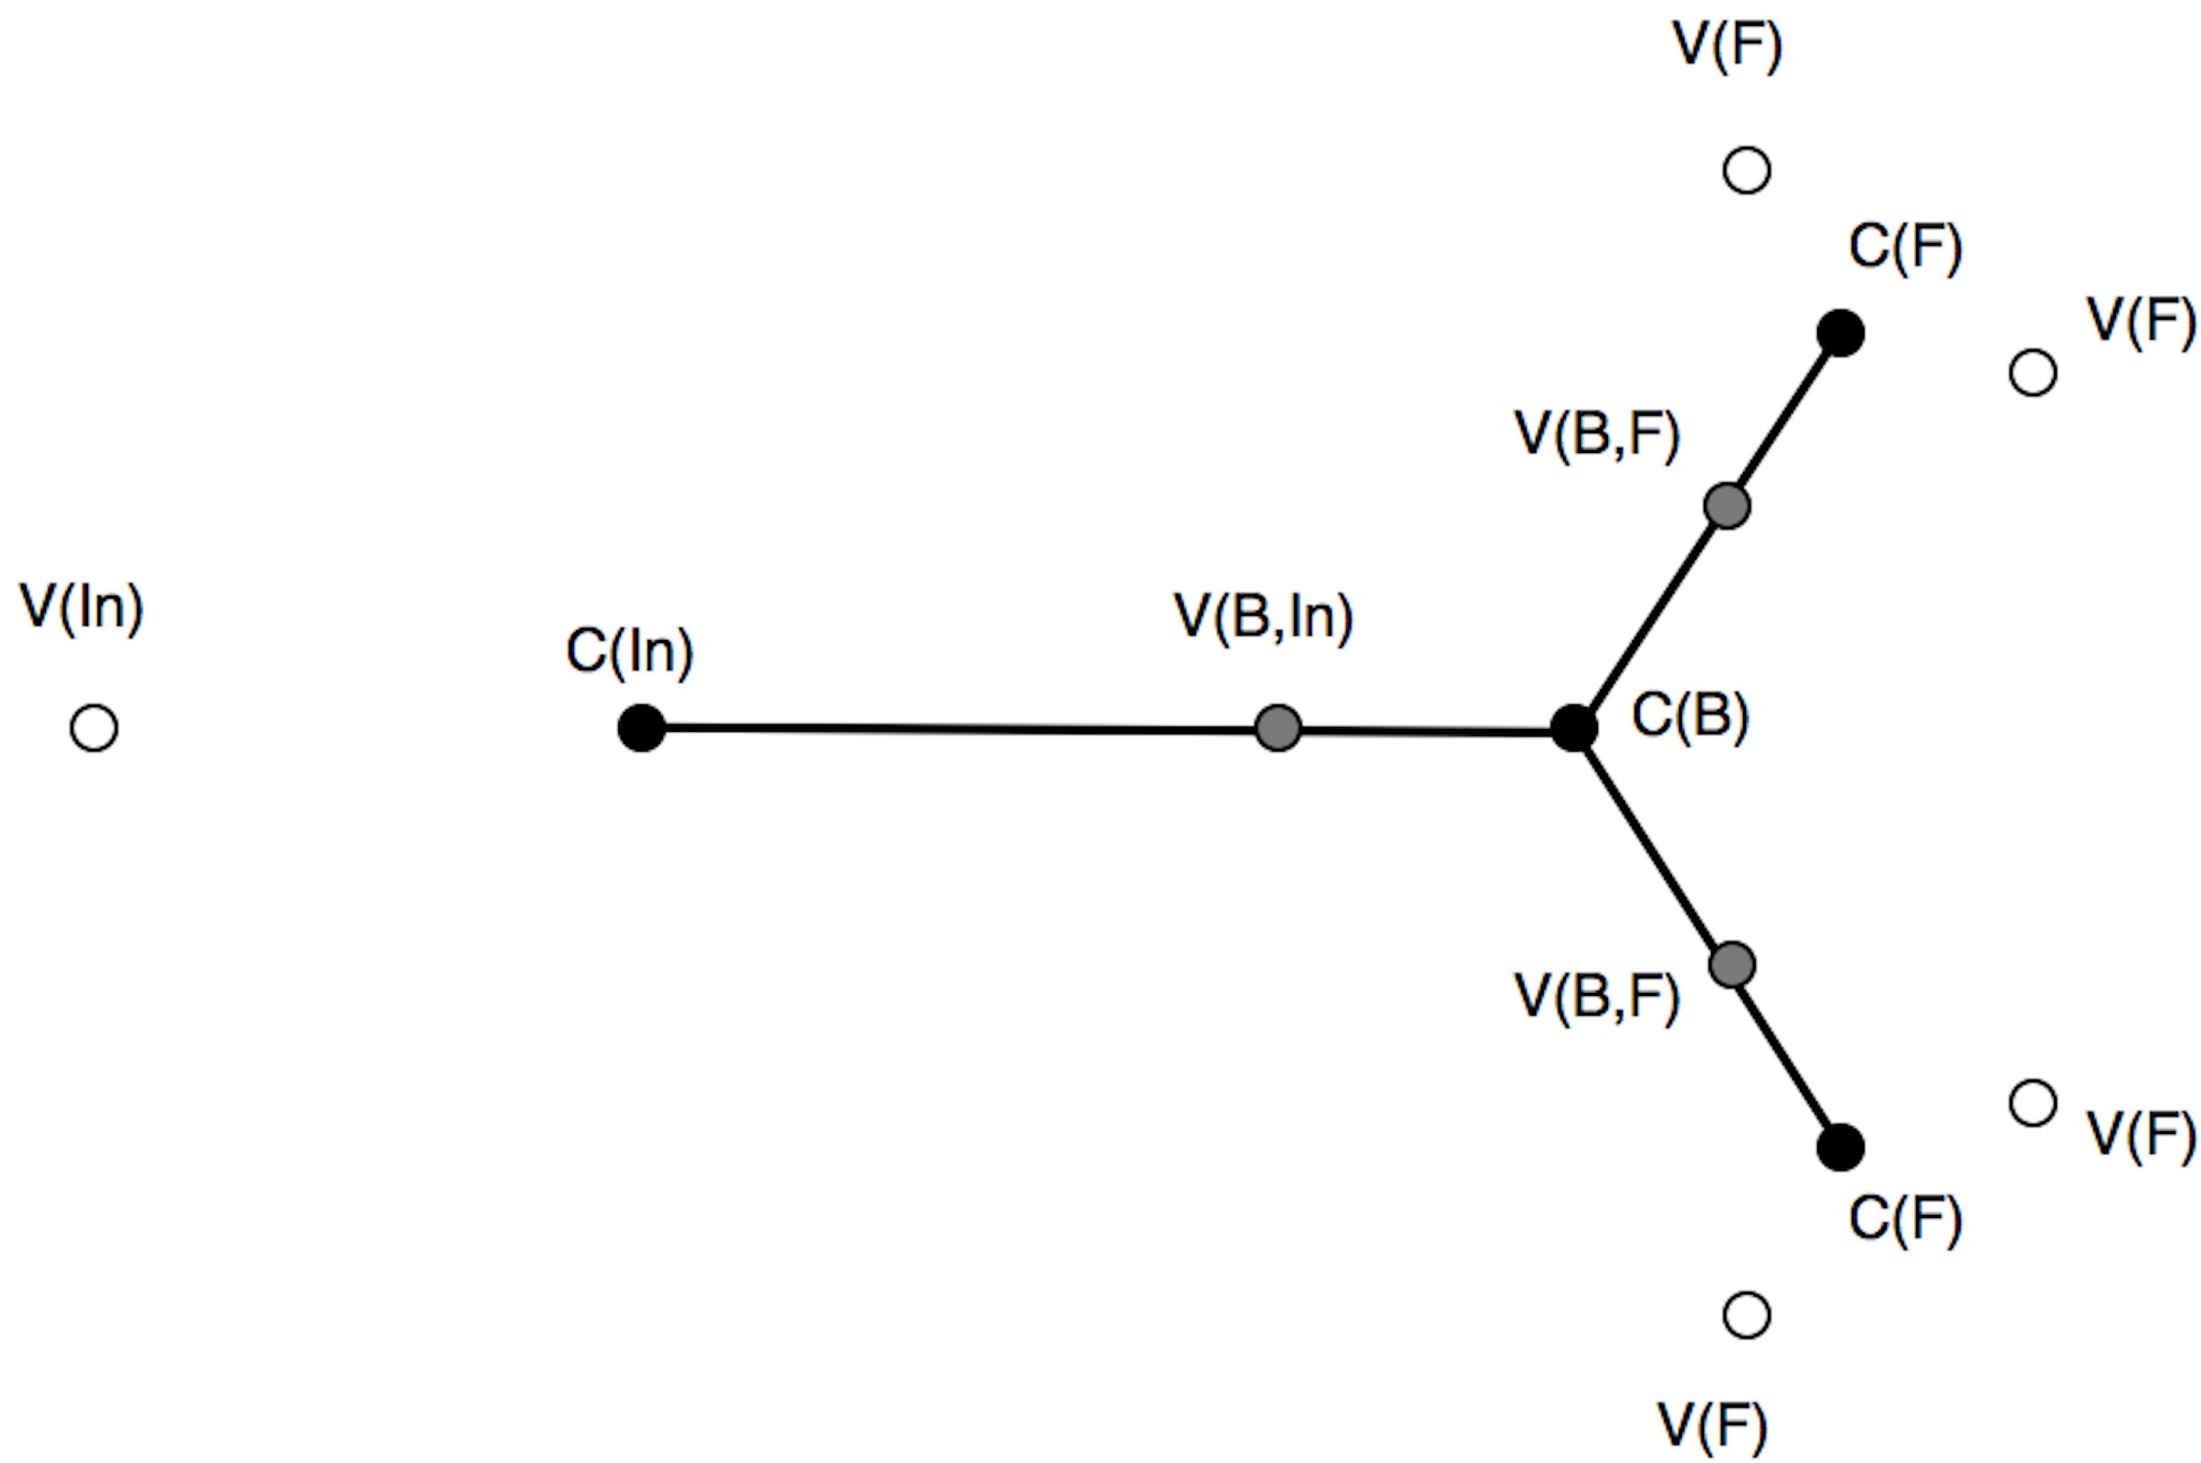

Supplement: d1nj01963e2.pdf [file d1nj01963e2.pdf]
